# Supplementary material for: Crystallization of calcium carbonate on polyethylene γ-radiation-grafted with acrylic acid
Source: Royal Society of Chemistry journal article supplement (doi:10.1039/b517550j), 2006-01-01
Supplement: b517550j.pdf [file b517550j.pdf]

## Crystallization of Calcium Carbonate on polyethylene $\gamma$ -radiation-grafted with acrylic acid

Fengying Zhang<sup>1,2</sup>, Zhengchi Hou<sup>1,\*</sup>, Kanglong Sheng<sup>1</sup>, Bo Deng<sup>1</sup>, Leidong Xie<sup>1</sup>

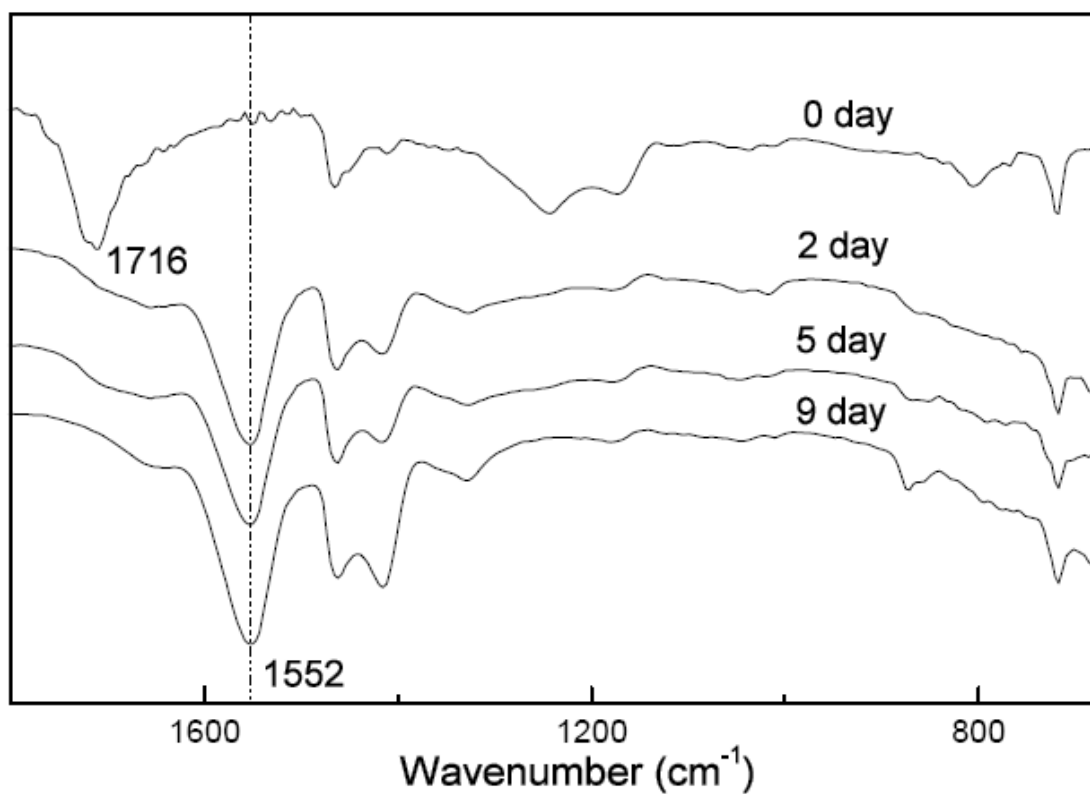

**Fig.S1.** ATR-IR spectra of grafted PE substrates (degree of grafting is about 50%) soaked in supersaturated calcium bicarbonate solution for different periods of time.
